# Supplementary material for: 14-3-3 σ Expression Effects G2/M Response to Oxygen and Correlates with Ovarian Cancer Metastasis
Source: PLoS One. 2011 Jan 10;6(1):e15864. doi: 10.1371/journal.pone.0015864 (PMC3018427; doi:10.1371/journal.pone.0015864)
Supplement: Table S1 — In vitro cell doubling time for the ovarian cancer cell lines. (XLS) [file pone.0015864.s002.xls]

## Sheet: Sheet1
Table S1
Cell doubling time (in hours)
Cell lines	0.21
A2780	17.1±1.1
OVCAR5	14.9±.0.7
OVCAR8	14.2±.0.6
HeyA8	16.7±2
HOC8	44.9±3.4
SKOV3	22.2±2.2
